# Supplementary material
Source: PubMed Central journal article supplement (PMC6866247)
Supplement: MCN-14-e12483-s001.pdf [file MCN-14-e12483-s001.pdf]

## Maternal Capacities Survey

Interviewer Name:

Translator Name:

### Domain 0: Demographics

| d1                     | d2                   | d3                          | d4                                 | d5                         | d6                            | d7                             | d8                       |
|------------------------|----------------------|-----------------------------|------------------------------------|----------------------------|-------------------------------|--------------------------------|--------------------------|
| ID #                   | Mom Age              | Mom Height                  | Mom Weight                         | Mom Education              | Mom Occupation                | Dad Education                  | Dad Occupation           |
|                        |                      |                             |                                    |                            |                               |                                |                          |
| d9                     | d10                  | d11                         | d12                                | d13                        | d14                           | d15                            | d16                      |
| # total birth children | Age at first birth   | # children mother cares for | # of female caregivers in compound | Walls of House             | Roof of House                 | Duka Ownership                 | Other business           |
|                        |                      |                             |                                    |                            |                               |                                |                          |
| d17                    | d18                  | d19                         | d20                                | d21                        | d22                           | d23                            | d24                      |
| Grow Cocoa for Sale    | Grow other Cash Crop | Does mother own land?       | Does father own land?              | Distance to water (m)      | Distance to Health center (m) | Food Acquisition               | Mobile Phone Ownership   |
|                        |                      |                             |                                    |                            |                               |                                |                          |
| d25                    | d26                  | d27                         | d28                                | d29                        | d30                           | d31                            | d32                      |
| Child Weight (kg)      | Child Height (cm)    | MUAC (cm)                   | Child (1=B, 2=G)                   | Child Birthdate (MM/DD/YY) | Today's Date (MM/DD/YY)       | <sup>d31</sup> Child in Months | <sup>d32</sup> Residence |
|                        |                      |                             |                                    |                            |                               |                                |                          |

| <u>Dad/Mom education</u> | <u>Dad occupation</u> | <u>Mom occupation</u> | <u>Walls</u>         | <u>Food acquisition</u>          |
|--------------------------|-----------------------|-----------------------|----------------------|----------------------------------|
| 0=None                   | 1=farmer              | 1=farmer              | 1=mud                | 1=Own garden                     |
| 1=P1                     | 2=soldier             | 2=housekeeper         | 2=mud, sand          | 2-market                         |
| 2=P2                     | 3=teacher             | 3= teacher            | 3=mud, sand, cement  | 3=garden, market, transfers etc. |
| 3=P3, etc..              | 4=student             | 4=duka keeper         | 4=brick, mud         | <b>Roof</b>                      |
| 8=S1                     | 5=business            | 5=business            | 5=brick, mud, cement | 1=Grass                          |
| 13=S6                    |                       |                       | 6=brick, cement      | 2=Tin                            |

Thank you for your willingness to participate in today's survey. The survey should take about 45 minutes to complete. Please ask me if you do not understand any questions. You may stop your participation at any time.

## Domain 1 – Household Roster

*“I would like to know about all of the children under 5 that live in your house that you care for. I realize that more than one mother may live here. For this list, I would like you to just list the children that you are the primary caregiver for.”*

| ID # | Child Initials | Gender<br>1=Boy<br>2=Girl | Age in years, months<br>(e.g. 3 years, 4 months) | Child Age in months<br>(e.g. 3 years 4 months =<br>$12 \times 3 + 4 = 40$ months) | Relationship to caregiver<br>1=biological child<br>2 = child of sibling that mother cares for<br>3=another child of husbands that mother cares for<br>4=orphan that mother cares for<br>5 =other (please list relationship) |
|------|----------------|---------------------------|--------------------------------------------------|-----------------------------------------------------------------------------------|-----------------------------------------------------------------------------------------------------------------------------------------------------------------------------------------------------------------------------|
| 1    |                |                           |                                                  |                                                                                   |                                                                                                                                                                                                                             |
| 2    |                |                           |                                                  |                                                                                   |                                                                                                                                                                                                                             |
| 3    |                |                           |                                                  |                                                                                   |                                                                                                                                                                                                                             |
| 4    |                |                           |                                                  |                                                                                   |                                                                                                                                                                                                                             |
| 5    |                |                           |                                                  |                                                                                   |                                                                                                                                                                                                                             |
| 6    |                |                           |                                                  |                                                                                   |                                                                                                                                                                                                                             |

### Household Roster

**h1 Total children under 5:**

**h2 Number of months between youngest child and older sibling:**

## Domain 2: Breastfeeding and Infant and Young Child Feeding

\*Note that the following breastfeeding/ child feeding questions should pertain to the youngest child in the household.

***"Now I would like to ask you about the liquids that (youngest child) may have had yesterday during the day or at night."***

| Number |                                                                                  | Response 0=No 1=Yes<br>98=DK |
|--------|----------------------------------------------------------------------------------|------------------------------|
| F1     | Has (youngest child) ever been breastfed?                                        |                              |
| F2     | Was (youngest child) breastfed during the day or the night in the last 24 hours? |                              |

| Number     | Question                                                                                                      | Response Code                      | Frequency of Response Code<br>For f4b, f4c, and f4f (bolded): "How many times yesterday during the day or at night did (youngest child) consume _____." |  |
|------------|---------------------------------------------------------------------------------------------------------------|------------------------------------|---------------------------------------------------------------------------------------------------------------------------------------------------------|--|
|            | "Did ( <b>youngest child</b> ) have any _____. " <i>READ THE LIST OF LIQUIDS STARTING WITH 'PLAIN WATER'.</i> | Response<br>0=No<br>1=Yes<br>98=DK |                                                                                                                                                         |  |
| F3a        | Plain water?                                                                                                  |                                    |                                                                                                                                                         |  |
| <b>F3b</b> | <b>Infant formula such as [insert local examples]?</b>                                                        |                                    | <b>f3b1</b>                                                                                                                                             |  |
| <b>F3c</b> | <b>Milk such as tinned, powdered, or fresh animal milk?</b>                                                   |                                    | <b>f3c1</b>                                                                                                                                             |  |
| F3d        | Juice or juice drinks?                                                                                        |                                    |                                                                                                                                                         |  |
| F3e        | Clear broth?                                                                                                  |                                    |                                                                                                                                                         |  |
| <b>F3f</b> | <b>Yogurt?</b>                                                                                                |                                    | <b>f3f1</b>                                                                                                                                             |  |
| F3g        | Thin porridge?                                                                                                |                                    |                                                                                                                                                         |  |
| F3h        | Any other liquids such as [list other water- based liquids available in the local setting]?                   |                                    |                                                                                                                                                         |  |
| F3i        | Any other liquids?                                                                                            |                                    |                                                                                                                                                         |  |

*“I would now like to ask you about the youngest child that you care for.”*

*“Please describe everything that (youngest child) ate yesterday during the day or night, whether at home or outside the home.”*

|                         |  |
|-------------------------|--|
| <b>Foods mentioned:</b> |  |
|-------------------------|--|

|            | QUESTIONS AND FILTERS                                                                    | RESPONSES<br>0 = No<br>1 = Yes<br>98 = DK |
|------------|------------------------------------------------------------------------------------------|-------------------------------------------|
| <b>F4a</b> | V2a. Porridge, bread, rice, noodles, or other foods made from grains                     |                                           |
| <b>F4b</b> | Pumpkin, carrots, squash, or sweet potatoes that are yellow or orange inside             |                                           |
| <b>F4c</b> | White potatoes, white yams, manioc, cassava, or any other foods made from roots          |                                           |
| <b>F4d</b> | Any dark green leafy vegetables                                                          |                                           |
| <b>F4e</b> | Ripe mangoes, ripe papayas, or <b>(insert other local vitamin A-rich fruits)</b>         |                                           |
| <b>F4f</b> | Any other fruits or vegetables                                                           |                                           |
| <b>F4g</b> | Liver, kidney, heart, or other organ meats                                               |                                           |
| <b>F4h</b> | Any meat, such as beef, pork, lamb, goat, chicken, or duck                               |                                           |
| <b>F4i</b> | Eggs                                                                                     |                                           |
| <b>F4j</b> | Fresh or dried fish, shellfish, or seafood                                               |                                           |
| <b>F4k</b> | Any foods made from beans, peas, lentils, nuts, or seeds                                 |                                           |
| <b>F4l</b> | Cheese, yogurt, or other milk products                                                   |                                           |
| <b>F4m</b> | Any oil, fats, or butter, or foods made with any of these                                |                                           |
| <b>F4n</b> | Any sugary foods such as chocolates, sweets, candies, pastries, cakes, or biscuits       |                                           |
| <b>F4o</b> | Condiments for flavor, such as chilies, spices, herbs, or fish powder                    |                                           |
| <b>F4p</b> | Grubs, snails, or insects                                                                |                                           |
| <b>F4q</b> | Foods made with red palm oil, red palm nut, or red palm nut pulp sauce                   |                                           |
| <b>F5</b>  | <b>Number of times child was fed semi-solid foods in the previous day (write number)</b> |                                           |

## Domain 3 – Social Support

*“I am now going to ask you some questions about how the people involved in your day to day life support you as you care for your children.”*

|     | Question                                                                                                                                                                            | Response Code                                    | Response |
|-----|-------------------------------------------------------------------------------------------------------------------------------------------------------------------------------------|--------------------------------------------------|----------|
| s1  | Are you currently married or living together with a man as married                                                                                                                  | 0=No<br>1= Yes<br>98=N/A                         |          |
| s2  | If no, were you ever married or living together with a man as if married?                                                                                                           | 0=No<br>1=Yes<br>98=N/A                          |          |
| s3  | What is your marital status now: are you widowed, divorced, or separated?                                                                                                           | 1=Widowed<br>2=Divorced<br>3=Seperated<br>98=N/A |          |
| s4  | Is your (husband/partner) living with you now or is he staying elsewhere?                                                                                                           | 0=Elsewhere<br>1=Living together                 |          |
| s5  | Does your (husband/partner) have other wives or does he live with other women as if married?                                                                                        | 0=No<br>1=Yes                                    |          |
| s6  | Including yourself, in total, how many wives or live-in partners does he have?                                                                                                      | Number of Partners                               |          |
| s7  | If your husband has multiple wives, which one are you in order from first (the one he has been married to the longest) to most recent (the one he has married most recently)        | 1=First<br>2=Second<br>3=Third<br>...<br>98=N/A  |          |
| s8  | Have you been married or lived with a man only once or more than once?                                                                                                              | 1=Only Once<br>2=More than Once                  |          |
| s9  | Are you involved in any women's or community groups, including religious organizations? An example may be a sewing group, an agricultural group, or a Bible study.                  | 0=No<br>1=Yes                                    |          |
| s10 | Do you have a leadership position in any women's or community groups, including religious organizations? An example may be a sewing group, an agricultural group, or a Bible study. | 0=No<br>1=Yes                                    |          |

***“Now I’m going to read you a series of statements and have you tell me how much you agree or disagree.”***

|             | <b><i>“To what extent do you agree with...”</i></b>                 | Strongly Disagree |   | Neutral |   | Strongly Agree | Response |
|-------------|---------------------------------------------------------------------|-------------------|---|---------|---|----------------|----------|
| <b>s11a</b> | There is a special person who is around when I am in need           | 1                 | 2 | 3       | 4 | 5              |          |
| <b>s11b</b> | There is a special person with whom I can share my joys and sorrows | 1                 | 2 | 3       | 4 | 5              |          |
| <b>s11c</b> | I have a special person who is a real source of comfort to me       | 1                 | 2 | 3       | 4 | 5              |          |
| <b>s11d</b> | There is a special person in my life that cares about my feelings   | 1                 | 2 | 3       | 4 | 5              |          |
| <b>s11e</b> | My family tries to help me                                          | 1                 | 2 | 3       | 4 | 5              |          |
| <b>s11f</b> | I can talk about my problems with my family                         | 1                 | 2 | 3       | 4 | 5              |          |
| <b>s11g</b> | My family is willing to help me make decisions                      | 1                 | 2 | 3       | 4 | 5              |          |
| <b>s11h</b> | My friends are really trying to help me                             | 1                 | 2 | 3       | 4 | 5              |          |
| <b>s11i</b> | I can count on my friends when things go wrong                      | 1                 | 2 | 3       | 4 | 5              |          |
| <b>s11j</b> | I have friends with whom I can share my joys and sorrows            | 1                 | 2 | 3       | 4 | 5              |          |

## **Domain 4: Psychological Wellbeing**

***“Now we will ask about how satisfied you are with different aspects of your life.”***

| <b><i>“In general, how satisfied are you with...”</i></b> |              | Very satisfied | Fairly Satisfied | Not very satisfied | Not at all satisfied | Response (98 = DK) |
|-----------------------------------------------------------|--------------|----------------|------------------|--------------------|----------------------|--------------------|
| P1a                                                       | Life overall | 1              | 2                | 3                  | 4                    |                    |
| P1b                                                       | Food         | 1              | 2                | 3                  | 4                    |                    |
| P1c                                                       | Housing      | 1              | 2                | 3                  | 4                    |                    |
| P1d                                                       | Income       | 1              | 2                | 3                  | 4                    |                    |

|     |                                                                                         |   |   |   |   |  |
|-----|-----------------------------------------------------------------------------------------|---|---|---|---|--|
| P1e | Health                                                                                  | 1 | 2 | 3 | 4 |  |
| P1f | Work                                                                                    | 1 | 2 | 3 | 4 |  |
| P1g | Degree to which people like me are safe in this community (from physical harm violence) | 1 | 2 | 3 | 4 |  |
| P1h | Friends                                                                                 | 1 | 2 | 3 | 4 |  |
| P1i | Husband's family (your in-laws)                                                         | 1 | 2 | 3 | 4 |  |
| P1j | Own family                                                                              | 1 | 2 | 3 | 4 |  |
| P1k | Education level                                                                         | 1 | 2 | 3 | 4 |  |
| P1l | Freedom to make choices                                                                 | 1 | 2 | 3 | 4 |  |
| P1m | Dignity (explain, overall sense of how you are valued by others)                        | 1 | 2 | 3 | 4 |  |
| P1n | Overall sense of safety in my community (from violence and crime)                       | 1 | 2 | 3 | 4 |  |
| P1o | Ability to help others                                                                  | 1 | 2 | 3 | 4 |  |
| P1p | Freedom to express my spiritual beliefs                                                 | 1 | 2 | 3 | 4 |  |

## Domain 5: Decision-making/Agency

***“Now, we’re going to talk about how you make decisions and who helps you make them. Like before, I will give you a statement and you will tell me how much you agree or disagree.”***

|            | <b><i>“To what extent do you agree with the following statements?”</i></b>                              | Disagree Strongly |   | Neutral |   | Agree Strongly | Response |
|------------|---------------------------------------------------------------------------------------------------------|-------------------|---|---------|---|----------------|----------|
| <b>a1a</b> | If my husband and I disagree about how to spend money for our household, my opinion is respected        | 1                 | 2 | 3       | 4 | 5              |          |
| <b>a1b</b> | If my husband and I disagree about how to spend money in our household, he will make the final decision | 1                 | 2 | 3       | 4 | 5              |          |
| <b>a1c</b> | I wish that I could use more of the money that we have in our household on food for my children         | 1                 | 2 | 3       | 4 | 5              |          |
| <b>a1d</b> | I feel uncomfortable with the way that my husband spends money                                          | 1                 | 2 | 3       | 4 | 5              |          |

|            |                                                                                                                    |   |   |   |   |   |  |
|------------|--------------------------------------------------------------------------------------------------------------------|---|---|---|---|---|--|
| <b>a1e</b> | When it comes to making decisions for my children, I feel confident in my ability to make good choices             | 1 | 2 | 3 | 4 | 5 |  |
| <b>a1f</b> | If my mother-in-law has a different opinion than me about how to care for my child, I am free to disagree with her | 1 | 2 | 3 | 4 | 5 |  |
| <b>a1g</b> | I feel that I have control over the number of children that I have with my husband                                 | 1 | 2 | 3 | 4 | 5 |  |
| <b>a1h</b> | I feel that I have control over when to have another child                                                         | 1 | 2 | 3 | 4 | 5 |  |
| <b>a1i</b> | It is appropriate in some circumstances for me to be physically abused (beaten) by my husband                      | 1 | 2 | 3 | 4 | 5 |  |
| <b>a1j</b> | It is appropriate for my husband/partner to force me to have sex                                                   | 1 | 2 | 3 | 4 | 5 |  |

***“I will now ask you about the decisions you make in your household about health.”***

|            |                                                                                                                                                 | Strongly disagree | Disagree | Agree | Strongly Agree | Don't know | Response |
|------------|-------------------------------------------------------------------------------------------------------------------------------------------------|-------------------|----------|-------|----------------|------------|----------|
| <b>a2a</b> | If my child has a serious health problem like diarrhea, there is no other way that I can help them than the way that I do now.                  | 1                 | 2        | 3     | 4              | 99         |          |
| <b>a2b</b> | If my child has a serious health problem, I do what my spouse or other person like friend or relative insist that I do                          | 1                 | 2        | 3     | 4              | 99         |          |
| <b>a3c</b> | If my child has a serious health problem, I act according to what other people expect of me to get their approval. If I didn't they'd blame me. | 1                 | 2        | 3     | 4              | 99         |          |
| <b>a3d</b> | If I have a serious health problem, I do what I personal consider is important                                                                  | 1                 | 2        | 3     | 4              | 99         |          |

## **Domain 6: Empowerment**



***“Now, I am going to ask you some questions about the power you feel you have over your own life.”***

|                                                                    | Yes | No | DK | Response |
|--------------------------------------------------------------------|-----|----|----|----------|
| e1 “Would you like to change anything in your life at this point?” | 1   | 0  | 98 |          |

|     |                                                                                                         |  |  |  |
|-----|---------------------------------------------------------------------------------------------------------|--|--|--|
| e2  | <b><i>“What three things would you like to change the most in your life at this point in time?”</i></b> |  |  |  |
| e2a |                                                                                                         |  |  |  |
| e2b |                                                                                                         |  |  |  |
| e2c |                                                                                                         |  |  |  |

| <b><i>e3 “Who do you think will contribute most to change in your life?”</i></b> |           |              |                  |                     |                 |          |
|----------------------------------------------------------------------------------|-----------|--------------|------------------|---------------------|-----------------|----------|
| 1                                                                                | 2         | 3            | 4                | 5                   | 6               | Response |
| Myself                                                                           | My Family | My community | Local Government | National Government | Other (specify) |          |

| <b><i>e4 “Do you feel that people like yourself can generally change things in this community if they want to?”</i></b> |                    |                               |                                |                |                 |          |
|-------------------------------------------------------------------------------------------------------------------------|--------------------|-------------------------------|--------------------------------|----------------|-----------------|----------|
| 1                                                                                                                       | 2                  | 3                             | 4                              | 5              | 6               | Response |
| Yes, very easily                                                                                                        | Yes, fairly easily | Yes, with a little difficulty | Yes, but with great difficulty | No, not at all | Other (specify) |          |

## **Overall Empowerment**

Imagine a ten step ladder, where the bottom, the first step, stand people who are completely without free choice and control over the way their lives turn out, and on the highest step, the tenth, stand those with the most free choice and control over their lives. In this context, we ask you to answer the following questions:

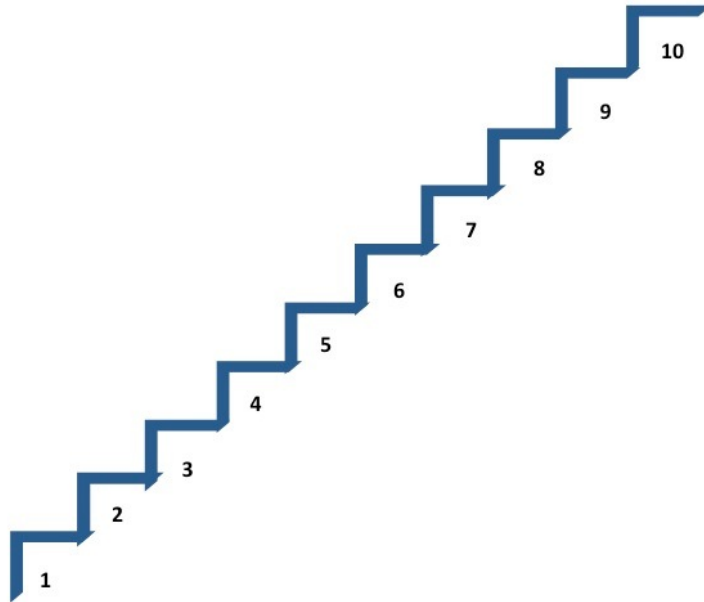

|     |                                                   | <b>Response (1-10)</b> |
|-----|---------------------------------------------------|------------------------|
| e5a | On which step are you today?                      |                        |
| e5b | On which step were you five years ago?            |                        |
| e5c | On which step are most of your neighbors today?   |                        |
| e5d | On which step do you think you will be in 1 year? |                        |
